# Supplementary material for: Peak nasal inspiratory flow as outcome for provocation studies in allergen exposure chambers: a GA2LEN study
Source: PubMed Central journal article supplement (PMC5604509; doi:10.1186/s13601-017-0169-4), 2017-09-17

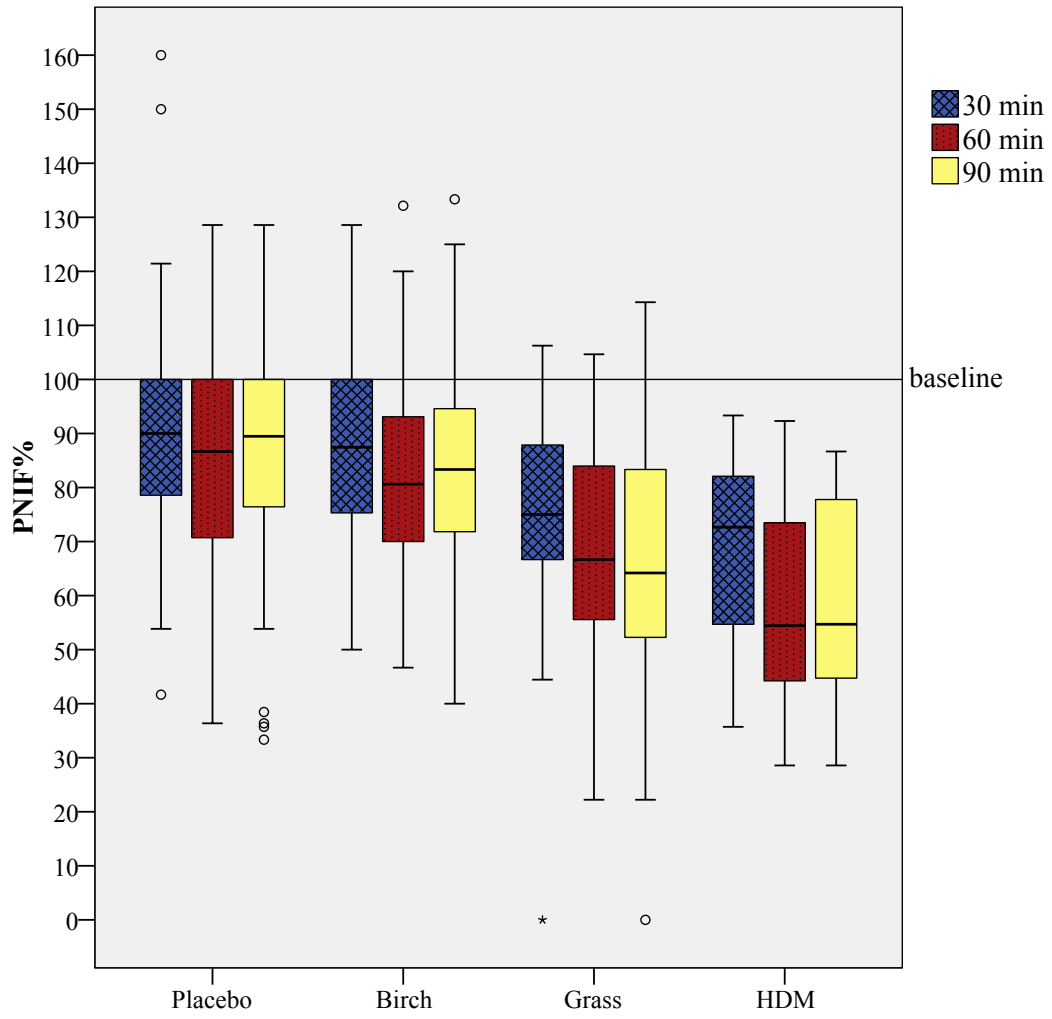

Supplement: 13601_2017_169_MOESM7_ESM.pdf [file 13601_2017_169_MOESM7_ESM.pdf]
