# Supplementary material for: Peak nasal inspiratory flow as outcome for provocation studies in allergen exposure chambers: a GA2LEN study
Source: Springer Nature journal article supplement (doi:10.1186/s13601-017-0169-4), 2017-09-17

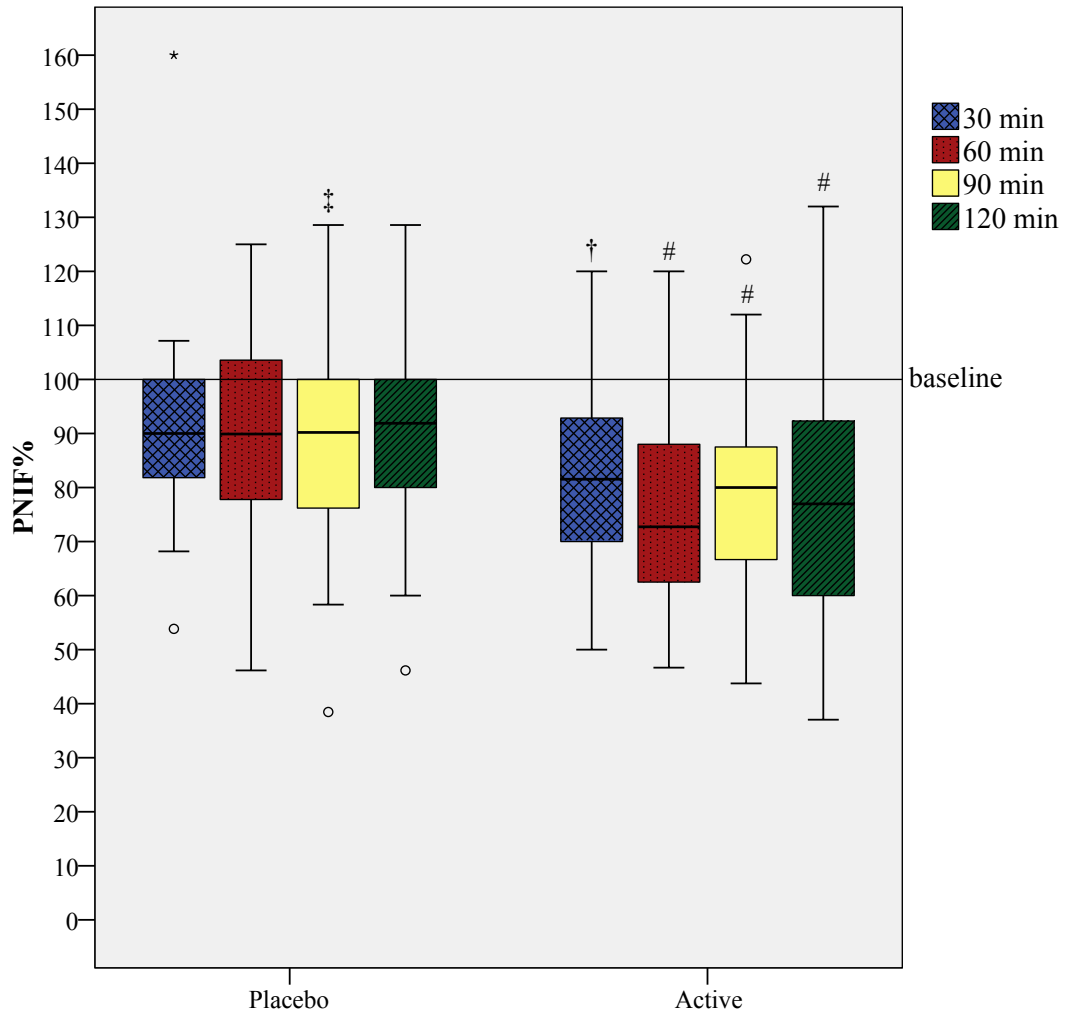

Supplement: MOESM4 [file 15069014]
